# Supplementary material for: A simulation study on estimating biomarker–treatment interaction effects in randomized trials with prognostic variables
Source: PubMed Central journal article supplement (PMC5819679; doi:10.1186/s13063-018-2491-0), 2018-02-20
Supplement: 13063_2018_2491_MOESM6_ESM.pdf [file 13063_2018_2491_MOESM6_ESM.pdf]

low censoring

$\Sigma_1$

$\Sigma_2$

$\Sigma_3$

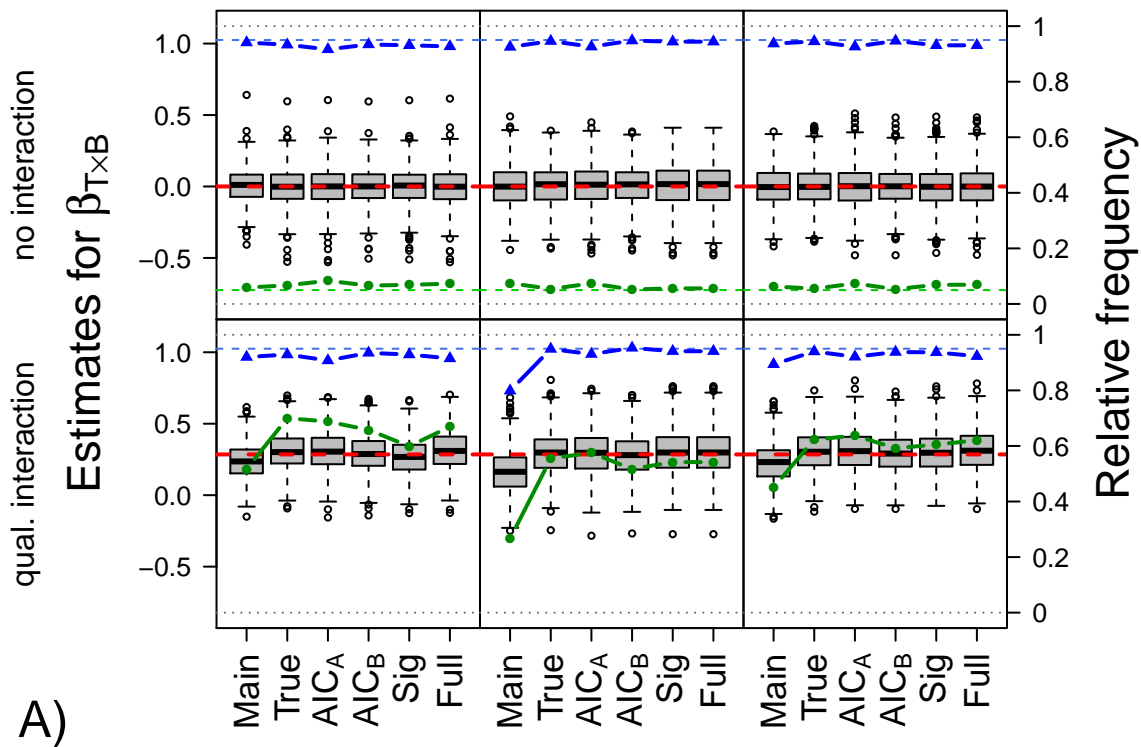

A)

● Rejection of  $H_0$

▲ Coverage

high censoring

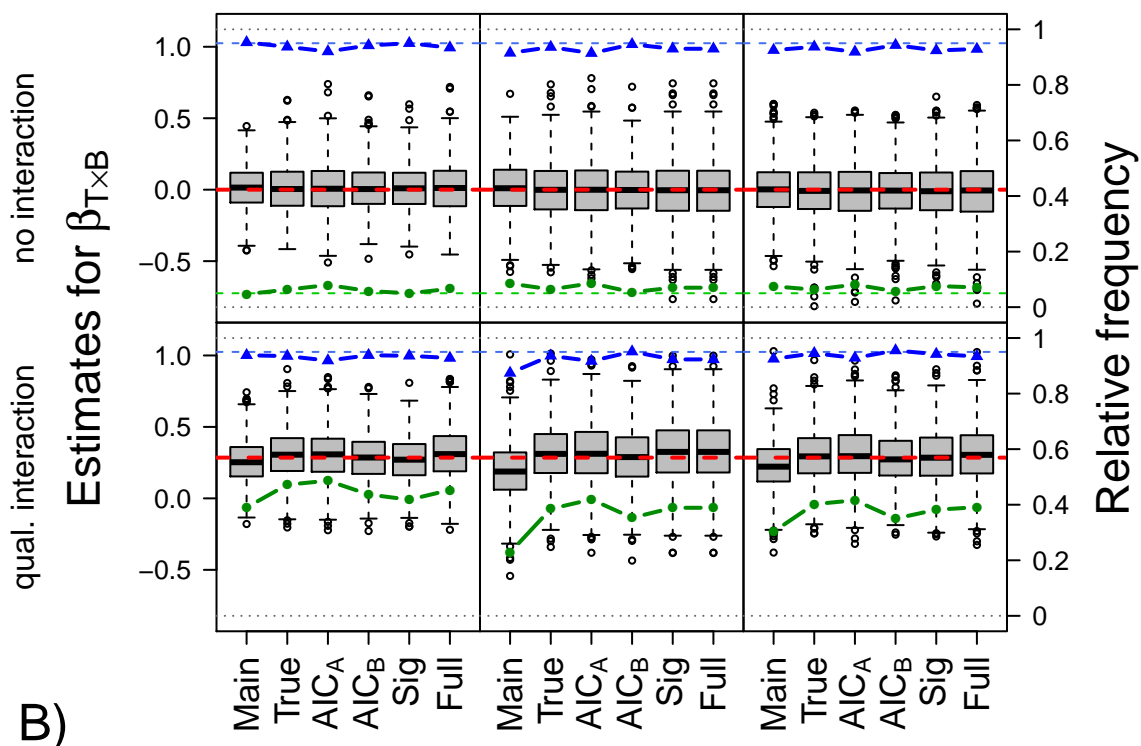

B)

Relative frequency
