# Supplementary material for: A simulation study on estimating biomarker–treatment interaction effects in randomized trials with prognostic variables
Source: PubMed Central journal article supplement (PMC5819679; doi:10.1186/s13063-018-2491-0), 2018-02-20
Supplement: 13063_2018_2491_MOESM8_ESM.pdf [file 13063_2018_2491_MOESM8_ESM.pdf]

| K  | $\Sigma$   | $\beta_k$    | Interact. | Cens. | Main | True | AIC <sub>A</sub> | AIC <sub>B</sub> | Sig  | Full |
|----|------------|--------------|-----------|-------|------|------|------------------|------------------|------|------|
| 24 | $\Sigma_1$ | $\beta_{eq}$ | no        | low   | 0    | 24   | 14.0             | 13.6             | 7.4  | 24   |
| 24 | $\Sigma_2$ | $\beta_{eq}$ | no        | low   | 0    | 24   | 12.7             | 13.6             | 24.0 | 24   |
| 24 | $\Sigma_3$ | $\beta_{eq}$ | no        | low   | 0    | 24   | 13.2             | 14.1             | 21.2 | 24   |
| 24 | $\Sigma_1$ | $\beta_{eq}$ | quant.    | low   | 0    | 24   | 14.0             | 13.4             | 7.3  | 24   |
| 24 | $\Sigma_2$ | $\beta_{eq}$ | quant.    | low   | 0    | 24   | 12.6             | 13.6             | 24.0 | 24   |
| 24 | $\Sigma_3$ | $\beta_{eq}$ | quant.    | low   | 0    | 24   | 13.2             | 14.2             | 21.1 | 24   |
| 24 | $\Sigma_1$ | $\beta_{eq}$ | qual.     | low   | 0    | 24   | 13.8             | 12.9             | 7.0  | 24   |
| 24 | $\Sigma_2$ | $\beta_{eq}$ | qual.     | low   | 0    | 24   | 12.5             | 13.7             | 24.0 | 24   |
| 24 | $\Sigma_3$ | $\beta_{eq}$ | qual.     | low   | 0    | 24   | 13.2             | 14.2             | 21.1 | 24   |
| 24 | $\Sigma_1$ | $\beta_v$    | no        | low   | 0    | 16   | 13.7             | 13.4             | 8.8  | 24   |
| 24 | $\Sigma_2$ | $\beta_v$    | no        | low   | 0    | 16   | 12.0             | 12.6             | 24.0 | 24   |
| 24 | $\Sigma_3$ | $\beta_v$    | no        | low   | 0    | 16   | 12.5             | 13.2             | 20.6 | 24   |
| 24 | $\Sigma_1$ | $\beta_v$    | quant.    | low   | 0    | 16   | 13.6             | 13.4             | 8.8  | 24   |
| 24 | $\Sigma_2$ | $\beta_v$    | quant.    | low   | 0    | 16   | 12.0             | 12.7             | 24.0 | 24   |
| 24 | $\Sigma_3$ | $\beta_v$    | quant.    | low   | 0    | 16   | 12.5             | 13.3             | 20.6 | 24   |
| 24 | $\Sigma_1$ | $\beta_v$    | qual.     | low   | 0    | 16   | 13.6             | 13.2             | 8.4  | 24   |
| 24 | $\Sigma_2$ | $\beta_v$    | qual.     | low   | 0    | 16   | 12.0             | 12.8             | 24.0 | 24   |
| 24 | $\Sigma_3$ | $\beta_v$    | qual.     | low   | 0    | 16   | 12.5             | 13.5             | 20.6 | 24   |
| 24 | $\Sigma_1$ | $\beta_{eq}$ | no        | high  | 0    | 24   | 10.5             | 10.3             | 5.2  | 24   |
| 24 | $\Sigma_2$ | $\beta_{eq}$ | no        | high  | 0    | 24   | 10.0             | 10.8             | 24.0 | 24   |
| 24 | $\Sigma_3$ | $\beta_{eq}$ | no        | high  | 0    | 24   | 10.2             | 10.9             | 20.2 | 24   |
| 24 | $\Sigma_1$ | $\beta_{eq}$ | quant.    | high  | 0    | 24   | 10.4             | 10.1             | 5.2  | 24   |
| 24 | $\Sigma_2$ | $\beta_{eq}$ | quant.    | high  | 0    | 24   | 10.1             | 11.0             | 24.0 | 24   |
| 24 | $\Sigma_3$ | $\beta_{eq}$ | quant.    | high  | 0    | 24   | 10.2             | 11.1             | 20.3 | 24   |
| 24 | $\Sigma_1$ | $\beta_{eq}$ | qual.     | high  | 0    | 24   | 10.4             | 9.9              | 4.9  | 24   |
| 24 | $\Sigma_2$ | $\beta_{eq}$ | qual.     | high  | 0    | 24   | 10.1             | 11.1             | 24.0 | 24   |
| 24 | $\Sigma_3$ | $\beta_{eq}$ | qual.     | high  | 0    | 24   | 10.2             | 11.2             | 20.3 | 24   |
| 24 | $\Sigma_1$ | $\beta_v$    | no        | high  | 0    | 16   | 11.5             | 11.2             | 6.8  | 24   |
| 24 | $\Sigma_2$ | $\beta_v$    | no        | high  | 0    | 16   | 9.9              | 10.6             | 24.0 | 24   |
| 24 | $\Sigma_3$ | $\beta_v$    | no        | high  | 0    | 16   | 10.3             | 10.9             | 19.7 | 24   |
| 24 | $\Sigma_1$ | $\beta_v$    | quant.    | high  | 0    | 16   | 11.4             | 11.2             | 6.7  | 24   |
| 24 | $\Sigma_2$ | $\beta_v$    | quant.    | high  | 0    | 16   | 9.9              | 10.7             | 24.0 | 24   |
| 24 | $\Sigma_3$ | $\beta_v$    | quant.    | high  | 0    | 16   | 10.4             | 11.1             | 19.7 | 24   |
| 24 | $\Sigma_1$ | $\beta_v$    | qual.     | high  | 0    | 16   | 11.4             | 11.2             | 6.6  | 24   |
| 24 | $\Sigma_2$ | $\beta_v$    | qual.     | high  | 0    | 16   | 10.0             | 10.9             | 24.0 | 24   |
| 24 | $\Sigma_3$ | $\beta_v$    | qual.     | high  | 0    | 16   | 10.7             | 11.5             | 19.8 | 24   |

Table S.2: Mean number of additionally included prognostic variables for all scenarios with  $K = 24$ .
