# Supplementary material for: A simulation study on estimating biomarker–treatment interaction effects in randomized trials with prognostic variables
Source: PubMed Central journal article supplement (PMC5819679; doi:10.1186/s13063-018-2491-0), 2018-02-20
Supplement: 13063_2018_2491_MOESM9_ESM.pdf [file 13063_2018_2491_MOESM9_ESM.pdf]

| K  | $\Sigma$   | $\beta_k$    | Interact. | Cens. | Main | True | AIC <sub>A</sub> | AIC <sub>B</sub> | Sig  | Full |
|----|------------|--------------|-----------|-------|------|------|------------------|------------------|------|------|
| 36 | $\Sigma_1$ | $\beta_{eq}$ | no        | low   | 0    | 36   | 20.6             | 20.1             | 10.6 | 36   |
| 36 | $\Sigma_2$ | $\beta_{eq}$ | no        | low   | 0    | 36   | 18.2             | 19.2             | 36.0 | 36   |
| 36 | $\Sigma_3$ | $\beta_{eq}$ | no        | low   | 0    | 36   | 20.0             | 20.9             | 27.2 | 36   |
| 36 | $\Sigma_1$ | $\beta_{eq}$ | quant.    | low   | 0    | 36   | 20.5             | 19.8             | 10.3 | 36   |
| 36 | $\Sigma_2$ | $\beta_{eq}$ | quant.    | low   | 0    | 36   | 18.3             | 19.2             | 36.0 | 36   |
| 36 | $\Sigma_3$ | $\beta_{eq}$ | quant.    | low   | 0    | 36   | 19.9             | 20.9             | 27.1 | 36   |
| 36 | $\Sigma_1$ | $\beta_{eq}$ | qual.     | low   | 0    | 36   | 20.3             | 19.0             | 9.9  | 36   |
| 36 | $\Sigma_2$ | $\beta_{eq}$ | qual.     | low   | 0    | 36   | 18.2             | 19.2             | 36.0 | 36   |
| 36 | $\Sigma_3$ | $\beta_{eq}$ | qual.     | low   | 0    | 36   | 19.9             | 20.8             | 27.1 | 36   |
| 36 | $\Sigma_1$ | $\beta_v$    | no        | low   | 0    | 24   | 20.4             | 20.1             | 12.5 | 36   |
| 36 | $\Sigma_2$ | $\beta_v$    | no        | low   | 0    | 24   | 17.6             | 18.3             | 36.0 | 36   |
| 36 | $\Sigma_3$ | $\beta_v$    | no        | low   | 0    | 24   | 19.2             | 19.8             | 27.4 | 36   |
| 36 | $\Sigma_1$ | $\beta_v$    | quant.    | low   | 0    | 24   | 20.5             | 20.0             | 12.4 | 36   |
| 36 | $\Sigma_2$ | $\beta_v$    | quant.    | low   | 0    | 24   | 17.6             | 18.3             | 36.0 | 36   |
| 36 | $\Sigma_3$ | $\beta_v$    | quant.    | low   | 0    | 24   | 19.1             | 19.9             | 27.3 | 36   |
| 36 | $\Sigma_1$ | $\beta_v$    | qual.     | low   | 0    | 24   | 20.4             | 19.6             | 11.9 | 36   |
| 36 | $\Sigma_2$ | $\beta_v$    | qual.     | low   | 0    | 24   | 17.6             | 18.3             | 36.0 | 36   |
| 36 | $\Sigma_3$ | $\beta_v$    | qual.     | low   | 0    | 24   | 19.0             | 19.9             | 27.2 | 36   |
| 36 | $\Sigma_1$ | $\beta_{eq}$ | no        | high  | 0    | 36   | 15.6             | 15.4             | 7.4  | 36   |
| 36 | $\Sigma_2$ | $\beta_{eq}$ | no        | high  | 0    | 36   | 15.2             | 16.0             | 36.0 | 36   |
| 36 | $\Sigma_3$ | $\beta_{eq}$ | no        | high  | 0    | 36   | 14.9             | 15.6             | 26.0 | 36   |
| 36 | $\Sigma_1$ | $\beta_{eq}$ | quant.    | high  | 0    | 36   | 15.7             | 15.4             | 7.5  | 36   |
| 36 | $\Sigma_2$ | $\beta_{eq}$ | quant.    | high  | 0    | 36   | 15.1             | 16.1             | 36.0 | 36   |
| 36 | $\Sigma_3$ | $\beta_{eq}$ | quant.    | high  | 0    | 36   | 14.8             | 15.7             | 26.1 | 36   |
| 36 | $\Sigma_1$ | $\beta_{eq}$ | qual.     | high  | 0    | 36   | 15.5             | 14.9             | 7.1  | 36   |
| 36 | $\Sigma_2$ | $\beta_{eq}$ | qual.     | high  | 0    | 36   | 15.2             | 16.1             | 36.0 | 36   |
| 36 | $\Sigma_3$ | $\beta_{eq}$ | qual.     | high  | 0    | 36   | 15.0             | 16.0             | 26.1 | 36   |
| 36 | $\Sigma_1$ | $\beta_v$    | no        | high  | 0    | 24   | 17.3             | 17.1             | 9.6  | 36   |
| 36 | $\Sigma_2$ | $\beta_v$    | no        | high  | 0    | 24   | 15.0             | 15.6             | 36.0 | 36   |
| 36 | $\Sigma_3$ | $\beta_v$    | no        | high  | 0    | 24   | 15.5             | 16.1             | 26.2 | 36   |
| 36 | $\Sigma_1$ | $\beta_v$    | quant.    | high  | 0    | 24   | 17.2             | 16.9             | 9.5  | 36   |
| 36 | $\Sigma_2$ | $\beta_v$    | quant.    | high  | 0    | 24   | 15.0             | 15.8             | 36.0 | 36   |
| 36 | $\Sigma_3$ | $\beta_v$    | quant.    | high  | 0    | 24   | 15.6             | 16.3             | 26.2 | 36   |
| 36 | $\Sigma_1$ | $\beta_v$    | qual.     | high  | 0    | 24   | 17.1             | 16.6             | 9.5  | 36   |
| 36 | $\Sigma_2$ | $\beta_v$    | qual.     | high  | 0    | 24   | 15.1             | 15.9             | 36.0 | 36   |
| 36 | $\Sigma_3$ | $\beta_v$    | qual.     | high  | 0    | 24   | 16.3             | 17.1             | 26.5 | 36   |

Table S.3: Mean number of additionally included prognostic variables for all scenarios with  $K = 36$ .
