# Supplementary material for: A simulation study on estimating biomarker–treatment interaction effects in randomized trials with prognostic variables
Source: Springer Nature journal article supplement (doi:10.1186/s13063-018-2491-0), 2018-02-20
Supplement: MOESM2 [file 15478300]

low censoring

$\Sigma_1$

$\Sigma_2$

$\Sigma_3$

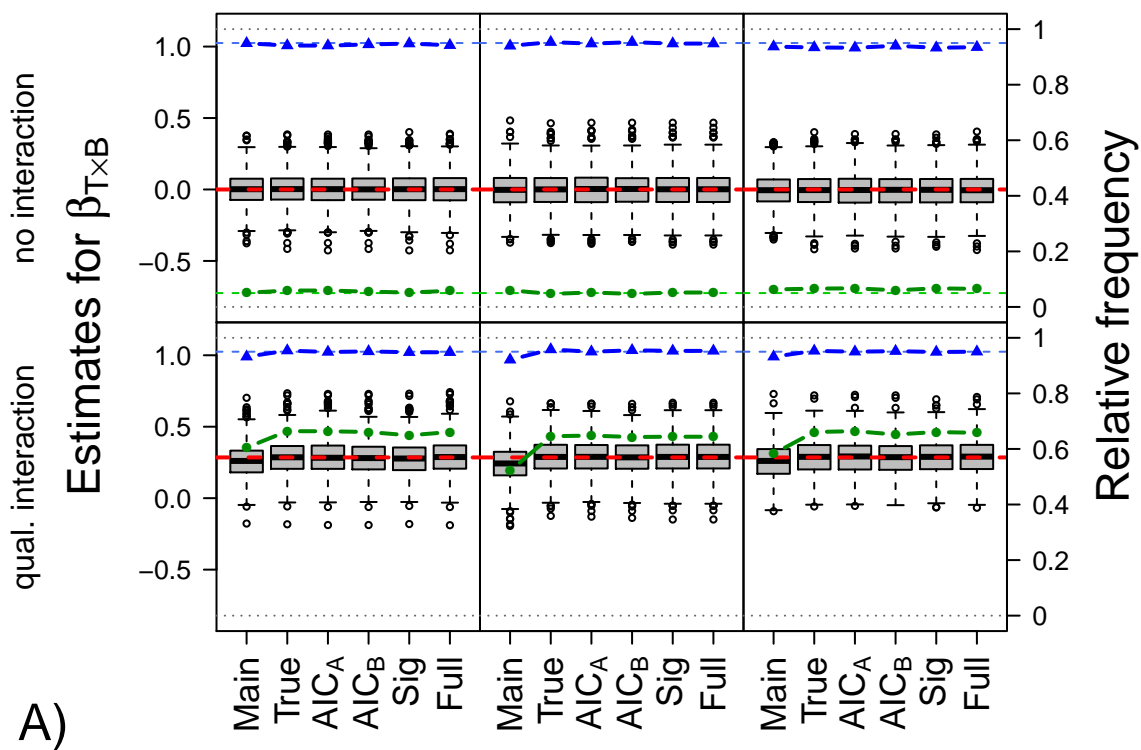

● Rejection of  $H_0$

▲ Coverage

high censoring

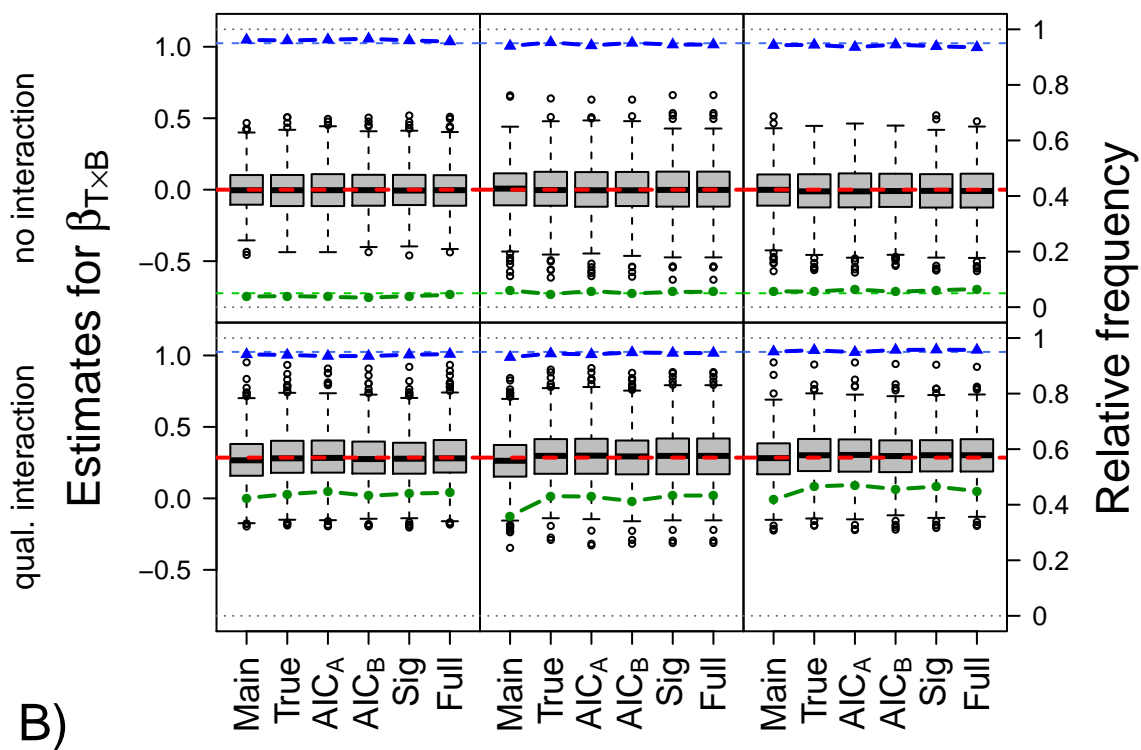

B)
