# Supplementary material for: A simulation study on estimating biomarker–treatment interaction effects in randomized trials with prognostic variables
Source: Springer Nature journal article supplement (doi:10.1186/s13063-018-2491-0), 2018-02-20

low censoring

 $\Sigma_1$  $\Sigma_2$  $\Sigma_3$ 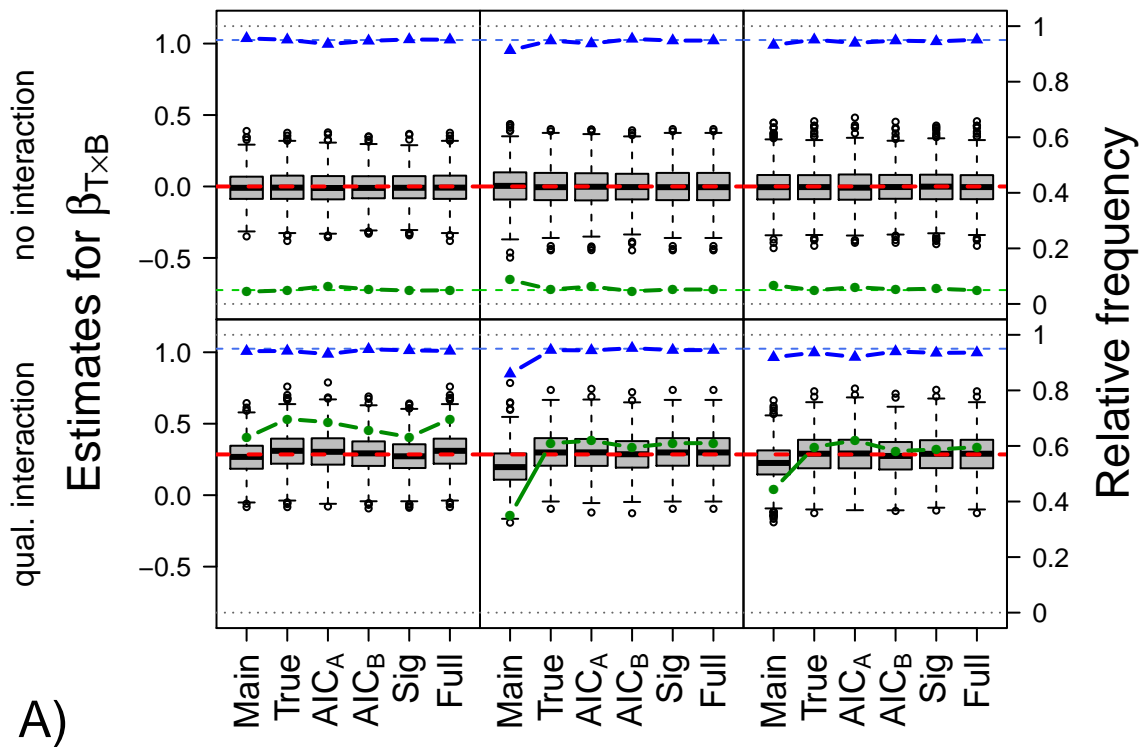● Rejection of  $H_0$ 

▲ Coverage

high censoring

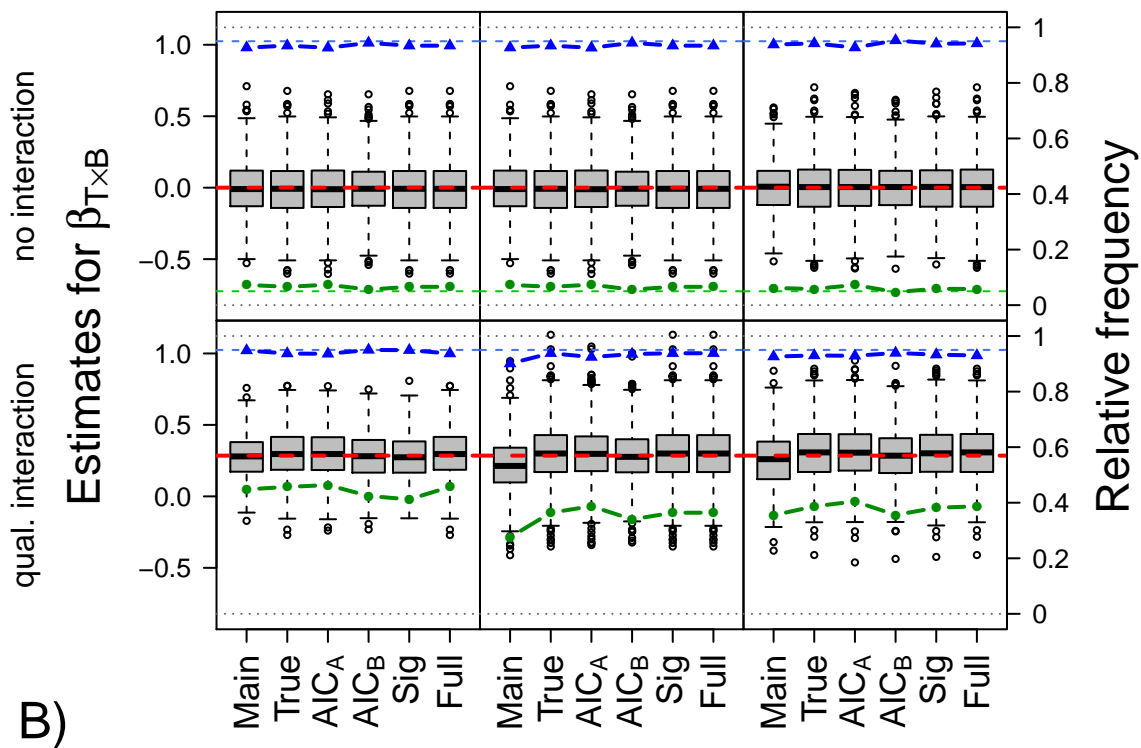

Supplement: MOESM3 [file 15478300]
