# Supplementary material for: A simulation study on estimating biomarker–treatment interaction effects in randomized trials with prognostic variables
Source: Springer Nature journal article supplement (doi:10.1186/s13063-018-2491-0), 2018-02-20
Supplement: MOESM7 [file 15478300]

| K  | $\Sigma$   | $\beta_k$    | Interact. | Cens. | Main | True | AIC <sub>A</sub> | AIC <sub>B</sub> | Sig  | Full |
|----|------------|--------------|-----------|-------|------|------|------------------|------------------|------|------|
| 12 | $\Sigma_1$ | $\beta_{eq}$ | no        | low   | 0    | 12   | 7.2              | 6.9              | 4.1  | 12   |
| 12 | $\Sigma_2$ | $\beta_{eq}$ | no        | low   | 0    | 12   | 6.4              | 7.3              | 12.0 | 12   |
| 12 | $\Sigma_3$ | $\beta_{eq}$ | no        | low   | 0    | 12   | 6.8              | 7.7              | 10.1 | 12   |
| 12 | $\Sigma_1$ | $\beta_{eq}$ | quant.    | low   | 0    | 12   | 7.1              | 6.8              | 3.9  | 12   |
| 12 | $\Sigma_2$ | $\beta_{eq}$ | quant.    | low   | 0    | 12   | 6.4              | 7.4              | 12.0 | 12   |
| 12 | $\Sigma_3$ | $\beta_{eq}$ | quant.    | low   | 0    | 12   | 6.8              | 7.8              | 10.0 | 12   |
| 12 | $\Sigma_1$ | $\beta_{eq}$ | qual.     | low   | 0    | 12   | 7.1              | 6.6              | 3.7  | 12   |
| 12 | $\Sigma_2$ | $\beta_{eq}$ | qual.     | low   | 0    | 12   | 6.3              | 7.6              | 12.0 | 12   |
| 12 | $\Sigma_3$ | $\beta_{eq}$ | qual.     | low   | 0    | 12   | 6.8              | 7.9              | 10.0 | 12   |
| 12 | $\Sigma_1$ | $\beta_v$    | no        | low   | 0    | 8    | 6.9              | 6.8              | 4.8  | 12   |
| 12 | $\Sigma_2$ | $\beta_v$    | no        | low   | 0    | 8    | 6.1              | 6.7              | 12.0 | 12   |
| 12 | $\Sigma_3$ | $\beta_v$    | no        | low   | 0    | 8    | 6.3              | 7.0              | 9.5  | 12   |
| 12 | $\Sigma_1$ | $\beta_v$    | quant.    | low   | 0    | 8    | 6.8              | 6.7              | 4.7  | 12   |
| 12 | $\Sigma_2$ | $\beta_v$    | quant.    | low   | 0    | 8    | 6.0              | 6.8              | 12.0 | 12   |
| 12 | $\Sigma_3$ | $\beta_v$    | quant.    | low   | 0    | 8    | 6.4              | 7.2              | 9.5  | 12   |
| 12 | $\Sigma_1$ | $\beta_v$    | qual.     | low   | 0    | 8    | 6.9              | 6.6              | 4.5  | 12   |
| 12 | $\Sigma_2$ | $\beta_v$    | qual.     | low   | 0    | 8    | 6.0              | 6.9              | 12.0 | 12   |
| 12 | $\Sigma_3$ | $\beta_v$    | qual.     | low   | 0    | 8    | 6.4              | 7.3              | 9.5  | 12   |
| 12 | $\Sigma_1$ | $\beta_{eq}$ | no        | high  | 0    | 12   | 5.3              | 5.2              | 2.8  | 12   |
| 12 | $\Sigma_2$ | $\beta_{eq}$ | no        | high  | 0    | 12   | 5.0              | 5.8              | 12.0 | 12   |
| 12 | $\Sigma_3$ | $\beta_{eq}$ | no        | high  | 0    | 12   | 5.1              | 5.8              | 9.3  | 12   |
| 12 | $\Sigma_1$ | $\beta_{eq}$ | quant.    | high  | 0    | 12   | 5.3              | 5.1              | 2.7  | 12   |
| 12 | $\Sigma_2$ | $\beta_{eq}$ | quant.    | high  | 0    | 12   | 5.1              | 6.0              | 12.0 | 12   |
| 12 | $\Sigma_3$ | $\beta_{eq}$ | quant.    | high  | 0    | 12   | 5.1              | 6.0              | 9.3  | 12   |
| 12 | $\Sigma_1$ | $\beta_{eq}$ | qual.     | high  | 0    | 12   | 5.2              | 5.0              | 2.6  | 12   |
| 12 | $\Sigma_2$ | $\beta_{eq}$ | qual.     | high  | 0    | 12   | 5.0              | 6.1              | 12.0 | 12   |
| 12 | $\Sigma_3$ | $\beta_{eq}$ | qual.     | high  | 0    | 12   | 5.1              | 6.1              | 9.3  | 12   |
| 12 | $\Sigma_1$ | $\beta_v$    | no        | high  | 0    | 8    | 5.7              | 5.7              | 3.6  | 12   |
| 12 | $\Sigma_2$ | $\beta_v$    | no        | high  | 0    | 8    | 4.9              | 5.5              | 12.0 | 12   |
| 12 | $\Sigma_3$ | $\beta_v$    | no        | high  | 0    | 8    | 5.2              | 5.8              | 9.1  | 12   |
| 12 | $\Sigma_1$ | $\beta_v$    | quant.    | high  | 0    | 8    | 5.7              | 5.7              | 3.5  | 12   |
| 12 | $\Sigma_2$ | $\beta_v$    | quant.    | high  | 0    | 8    | 5.0              | 5.7              | 12.0 | 12   |
| 12 | $\Sigma_3$ | $\beta_v$    | quant.    | high  | 0    | 8    | 5.2              | 5.9              | 9.1  | 12   |
| 12 | $\Sigma_1$ | $\beta_v$    | qual.     | high  | 0    | 8    | 5.8              | 5.6              | 3.5  | 12   |
| 12 | $\Sigma_2$ | $\beta_v$    | qual.     | high  | 0    | 8    | 4.9              | 5.8              | 12.0 | 12   |
| 12 | $\Sigma_3$ | $\beta_v$    | qual.     | high  | 0    | 8    | 5.4              | 6.2              | 9.2  | 12   |

Table S.1: Mean number of additionally included prognostic variables for all scenarios with  $K = 12$ .
